# Supplementary material
Source: Research Square preprint supplement (doi:10.21203/rs.3.rs-10340828/v1)
Supplement: Supplementary file 1 [file c450c209f8c7bdbea46cd184.docx]

# Supplementary Methods

## SM1. Field sampling and dilution-experiment design

**SM1.1 Phytoplankton dilution experiments**

Phytoplankton dilution experiments followed the seawater dilution technique for estimating microzooplankton grazing. At each station, approximately 40 L of surface seawater was collected and passed through a 200 μm mesh, and the resulting filtrate was defined as natural seawater. Filtered seawater was prepared by filtration through GF/F filters (0.7 μm; Whatman). Filtered and natural seawater were mixed at four dilution levels (filtered: natural = 0:8, 1:7, 4:4, and 7:1, v/v) and incubated in 2.4 L bottles (one replicate per level) in situ for 24 h nearshore. Subsamples (500 mL each) were taken before and after incubation and filtered onto GF/F filters for chlorophyll a (Chl *a*) determination. During filtration, 1 mL of MgCO₃ suspension (10 g L⁻¹) was added to prevent Chl *a* demetallation. After filtration, the filters were folded in half and placed in 10 mL centrifuge tubes wrapped with aluminum foil to protect pigments from light, and stored at −20 °C until analysis.

**SM1.2 Bacterial dilution experiments**

Bacterial dilution experiments quantified bacterial growth rate and grazing mortality using a dilution curve framework. Filtered seawater was prepared by filtering natural seawater through 0.22 μm mixed fiber membrane filters. Natural seawater and filtered seawater were mixed at five dilution ratios (natural seawater: filtered seawater = 4:0, 3:1, 2:2, 1:3, and 0:4, v/v). The final volume of each mixture was 200 mL, and the incubations were conducted in situ for about 1 h. Planktonic bacterial abundance was measured before and after incubation. For each incubation bottle, 4 mL subsamples were (1) collected into centrifuge tubes, (2) fixed with glutaraldehyde (0.5% final concentration), (3) kept in the dark for 20 min at room temperature, (4) flash frozen in liquid nitrogen, and (5) stored at −80 °C for subsequent flow-cytometric enumeration.

**SM1.3 Environmental variables**

Surface water physicochemical parameters were measured in situ using a multiparameter meter (HORiBA U52G), including depth, temperature, DO, pH, salinity, turbidity, conductivity, and related variables, following standard procedures. DIN, DIP, and silicate (Si) were analyzed with an automated nutrient analyzer (Skalar SANplus) using standard colorimetric methods, with analytical precision within 5–10%.

## SM2. Community assembly analyses

**SM2.1 Beta diversity and environmental association analyses**

Beta diversity was assessed using Bray–Curtis dissimilarities and visualized with NMDS. Differences in composition among seasons were tested using ANOSIM. To reduce multicollinearity among environmental predictors prior to Mantel tests and partial redundancy analysis (pRDA), variables were grouped by hierarchical clustering of Pearson correlations and one representative variable was retained from each cluster with |r| ≥ 0.95, followed by stepwise variance inflation factor screening (VIF < 10) to obtain the final predictor set. Single-factor Mantel tests related Bray–Curtis community dissimilarities to Euclidean distances of each environmental factor using Spearman correlations with 999 permutations, with *p*-values adjusted by Benjamini–Hochberg correction. pRDA was performed on Hellinger-transformed ASV data constrained by standardized environmental variables, with sampling station included as a conditioning variable to account for repeated observations from the same stations. Overall model significance, axis-level significance, and the marginal effects of individual environmental variables were evaluated using permutation tests with 999 permutations.

**SM2.2 Neutral community model**

Community assembly was further evaluated using a neutral community model (NCM), fitting the relationship between ASV mean relative abundance and occurrence frequency to estimate immigration rate m, Nm, and R². ASVs were classified as above, within, or below neutral expectations based on the 95% confidence interval of model predictions. The NCM was fitted separately to the bacterial and microeukaryotic datasets.

## SM3. Network construction and topology

**SM3.1 Seasonal co-occurrence networks**

Seasonal co-occurrence networks were constructed separately for each season using relative abundance matrices of 16S and 18S ASVs together with the subset of environmental variables retained after collinearity screening. Pairwise Spearman correlations (*ρ*) were calculated within each season. Robust associations were defined as |*ρ*| ≥ 0.60 with Benjamini and Hochberg false discovery rate correction at q ≤ 0.05.

**SM3.2 Network visualization and topology**

Undirected weighted networks were built in R using igraph. Node attributes included data source (16S, 18S, or environmental) and phylum-level taxonomy for ASVs. Networks were exported as GraphML and visualized in Gephi v0.10.1, and topological properties and modular structure were quantified. To evaluate departures from random expectations, Erdős–Rényi random graphs were generated with the same numbers of nodes and edges as empirical networks (100 replicates per season). For empirical and random networks, clustering coefficient, characteristic path length, and modularity were compared, and degree distributions were inspected to assess heterogeneity and small-world organization.

## SM4. Derived rate metrics and carbon flow calculations

**SM4.1 Phytoplankton dilution experiments and derived metrics**

Phytoplankton growth and microzooplankton grazing rates were estimated using the seawater dilution method. For each dilution treatment, phytoplankton biomass was quantified as Chl *a* (μg L⁻¹) at the start (𝑃0) and end (𝑃𝑡) of incubation. The apparent net growth rate (𝜇′, d⁻¹) was calculated as:

Where 𝑡 is incubation duration in days. Across dilution treatments, 𝜇′ is expected to vary linearly with the fraction of undiluted natural seawater (𝑓):

Where 𝜇 is the intrinsic phytoplankton growth rate (d⁻¹) and 𝑔 is the microzooplankton grazing rate (d⁻¹). Linear regression of 𝜇′ against 𝑓 yields 𝜇 (intercept) and 𝑔 (slope).

Chl *a* was converted to phytoplankton carbon biomass (μg C L⁻¹) using a carbon: Chl *a* ratio of 50:1 (w:w). Mean phytoplankton carbon biomass during incubation (𝐶𝑚) was approximated from initial and final biomass under the standard assumptions of the dilution method. Derived grazing-impact and carbon-flux metrics followed Calbet and Landry, including:

Where: 𝑃𝑃 is phytoplankton production (μg C L⁻¹ d⁻¹), 𝐼𝑐 is ingestion flux of phytoplankton carbon by microzooplankton (μg C L⁻¹ d⁻¹), 𝑃𝑖 is grazing impact on standing stock (%), 𝑃𝑝 is grazing impact on production (%), and 𝐶0 is initial phytoplankton carbon biomass (μg C L⁻¹).

**SM4.2 Bacterial dilution experiments and derived metrics**

Bacterial intrinsic growth (𝜇, h⁻¹) and grazing-induced mortality (𝑔, h⁻¹) were estimated using a dilution-curve framework adapted for heterotrophic bacterioplankton. Bacterial abundance (cells mL⁻¹) was measured by flow cytometry after SYBR Green I staining and addition of fluorescent counting beads.

For each dilution treatment, the apparent net growth rate was calculated from bacterial abundance at the start (𝑁0) and end (𝑁𝑡) of incubation:

Net growth rates were regressed against the fraction of undiluted seawater (𝑓) to estimate 𝜇 (intercept) and 𝑔(slope):

Cell abundance was converted to bacterial carbon biomass using 20 fg C cell⁻¹. Mean bacterial carbon biomass during incubation (𝐶𝑏𝑎𝑐𝑡) was approximated from initial and final biomass. Bacterial production (*BP*, μg C L⁻¹ h⁻¹) and grazing loss (*G*, μg C L⁻¹ h⁻¹) were calculated as:

Additional grazing-impact metrics were defined as:

Where is initial bacterial carbon biomass (μg C L⁻¹). When expressed as carbon-flow efficiency, bacterioplankton-derived transfer was calculated as , which is equivalent to . Assumptions followed Landry and Hassett and subsequent bacterioplankton applications, including short incubations, approximately exponential dynamics over the incubation window, and unsaturated grazing within the experimental range.

## SM4.3 Data screening and seasonal summaries

Not all dilution regressions in stations yielded usable estimates. Blank cells in Tables S6 and S7 indicate estimates not available due to poor regression fits. Stations were retained for summary analyses only when the corresponding regression produced interpretable rate estimates and the derived flux terms required for seasonal summaries could be calculated. Stations lacking usable estimates were excluded from the corresponding summary metric.

Because regression quality varied among stations and seasons, especially in the bacterioplankton dilution dataset, absolute fluxes and efficiency ratios were summarized separately. Absolute carbon fluxes (*PP*, 𝐼𝑐, *BP*, and *G*) were summarized using means across usable stations. Carbon flow efficiency ratios were first calculated at the station level as for phytoplankton and for bacterioplankton, and then summarized across stations using medians to reduce sensitivity to skewed distributions, extreme values, and uneven regression quality. This summary rule was used in the revised seasonal carbon flow presentation.

## SM5. PLS-SEM specification and diagnostics

All indicators were standardized (z-scored) prior to analysis. Four latent constructs were defined:

Nutrients: DIN, DIP, and Si

Physical–chemical conditions: depth, temperature, salinity, turbidity, pH, and related variables measured in situ

Biodiversity: selected bacterial and microeukaryotic diversity indices

Growth and grazing processes: growth and grazing rates derived from dilution experiments for phytoplankton and bacteria (𝜇 and 𝑔), together with derived carbon-flux metrics

Season was treated as an exogenous categorical temporal factor. For each construct, principal component analysis (PCA) was applied to the standardized indicators. The first principal component (PC1) was used as the manifest score representing that construct in the measurement model. For each PCA, the variance explained by PC1 and the indicator loadings were recorded to document how the construct score was derived.

Based on a priori hypotheses, structural paths were specified to represent the following ordering:

Nutrients → Biodiversity

Physical–chemical conditions → Biodiversity

Biodiversity → Growth and grazing processes

Nutrients → Growth and grazing processes

Physical–chemical conditions → Growth and grazing processes

Season → Biodiversity

Season → Growth and grazing processes

Models were estimated using cSEM. Path coefficients were obtained via PLS estimation, and uncertainty was assessed with 2,000 bootstrap resamples. For each endogenous construct, 𝑅2 was reported to quantify explained variance. The following outputs are provided: the final path diagram with standardized coefficients; a table of bootstrapped standard errors, confidence intervals, and *p*-values for all structural paths; and 𝑅2 values for endogenous constructs. Given the relatively small sample size and the broad construct-level focus of this analysis, the PLS-SEM was interpreted as an exploratory framework for summarizing multivariate associations rather than as definitive evidence of causal pathways.

# Supplementary Tables

## Table S1. Alpha-diversity indices and Good’s coverage for bacterial (16S) and microeukaryotic (18S) communities across all samples.

Note: Good’s coverage is reported as percentage (%).

**Table S1A. 16S (bacteria)**

| **Sample** | **ASV richness** | **ACE** | **Chao1** | **Shannon index** | **Simpson index** | **Pielou’s evenness** | **Good’s coverage** |
| --- | --- | --- | --- | --- | --- | --- | --- |
| FJB200701 | 48 | 50.00 | 48.50 | 3.207 | 0.938 | 0.828 | 99.97 |
| FJB200702 | 110 | 116.40 | 114.67 | 3.741 | 0.956 | 0.796 | 99.87 |
| FJB200703 | 79 | 79.10 | 79.00 | 3.417 | 0.944 | 0.782 | 99.98 |
| FJB200704 | 75 | 75.00 | 75.00 | 3.499 | 0.951 | 0.810 | 100.00 |
| FJB200705 | 95 | 101.00 | 98.75 | 3.563 | 0.949 | 0.782 | 99.90 |
| FJB200706 | 87 | 105.00 | 94.50 | 3.296 | 0.931 | 0.738 | 99.90 |
| FJB200707 | 102 | 106.00 | 104.00 | 3.763 | 0.963 | 0.814 | 99.93 |
| FJB200708 | 111 | 117.12 | 115.20 | 3.689 | 0.956 | 0.783 | 99.88 |
| FJB200709 | 99 | 99.75 | 99.43 | 3.505 | 0.946 | 0.763 | 99.95 |
| FJB200710 | 85 | 87.25 | 86.00 | 3.752 | 0.963 | 0.845 | 99.95 |
| FJB200711 | 153 | 153.75 | 153.43 | 4.159 | 0.973 | 0.827 | 99.95 |
| FJB200712 | 135 | 136.25 | 135.91 | 3.829 | 0.958 | 0.781 | 99.92 |
| FJB200713 | 142 | 142.45 | 142.27 | 4.190 | 0.975 | 0.845 | 99.95 |
| FJB200714 | 148 | 149.56 | 149.11 | 4.283 | 0.979 | 0.857 | 99.92 |
| FJB200715 | 129 | 134.79 | 133.50 | 4.017 | 0.970 | 0.826 | 99.85 |
| FJB200716 | 101 | 105.00 | 103.00 | 3.775 | 0.954 | 0.818 | 99.93 |
| FJB200717 | 119 | 119.64 | 119.38 | 3.659 | 0.949 | 0.766 | 99.95 |
| FJB200718 | 84 | 84.90 | 84.50 | 3.310 | 0.933 | 0.747 | 99.95 |
| FJB200719 | 96 | 100.00 | 98.00 | 3.677 | 0.942 | 0.806 | 99.93 |
| FJB200720 | 127 | 127.67 | 127.25 | 3.976 | 0.966 | 0.821 | 99.97 |
| FJB200721 | 129 |  | 144.00 | 4.300 | 0.981 | 0.885 | 99.90 |
| FJB200722 | 71 | 73.00 | 71.50 | 3.551 | 0.956 | 0.833 | 99.97 |
| FJB201001 | 95 | 95.00 | 95.00 | 3.908 | 0.967 | 0.858 | 100.00 |
| FJB201002 | 53 | 53.00 | 53.00 | 3.185 | 0.920 | 0.802 | 100.00 |
| FJB201003 | 113 | 114.60 | 114.00 | 3.983 | 0.967 | 0.842 | 99.93 |
| FJB201004 | 108 | 110.00 | 108.50 | 3.750 | 0.955 | 0.801 | 99.97 |
| FJB201005 | 108 | 110.25 | 109.00 | 3.865 | 0.963 | 0.825 | 99.95 |
| FJB201006 | 90 | 90.67 | 90.25 | 3.670 | 0.956 | 0.815 | 99.97 |
| FJB201007 | 147 | 150.12 | 149.00 | 4.214 | 0.975 | 0.844 | 99.92 |
| FJB201008 | 108 |  | 109.00 | 3.925 | 0.964 | 0.838 | 99.97 |
| FJB201009 | 260 | 279.57 | 278.12 | 4.342 | 0.972 | 0.781 | 99.49 |
| FJB201010 | 349 | 370.55 | 369.76 | 4.570 | 0.975 | 0.780 | 99.16 |
| FJB201011 | 382 | 401.96 | 401.17 | 4.779 | 0.980 | 0.804 | 99.23 |
| FJB201012 | 354 | 365.07 | 364.41 | 4.761 | 0.977 | 0.811 | 99.51 |
| FJB201013 | 451 | 490.52 | 489.33 | 4.953 | 0.982 | 0.810 | 98.82 |
| FJB201014 | 254 | 264.50 | 263.55 | 4.398 | 0.973 | 0.794 | 99.65 |
| FJB201015 | 301 | 315.06 | 314.18 | 4.463 | 0.972 | 0.782 | 99.49 |
| FJB201016 | 425 | 472.06 | 470.72 | 4.933 | 0.984 | 0.815 | 98.70 |
| FJB201017 | 267 | 280.13 | 279.40 | 4.340 | 0.970 | 0.777 | 99.46 |
| FJB201018 | 178 | 180.23 | 179.75 | 4.070 | 0.965 | 0.786 | 99.88 |
| FJB201019 | 342 | 363.66 | 362.79 | 4.554 | 0.975 | 0.780 | 99.21 |
| FJB201020 | 268 | 274.90 | 274.33 | 4.311 | 0.958 | 0.771 | 99.66 |
| FJB201021 | 443 | 491.13 | 489.72 | 4.909 | 0.980 | 0.806 | 98.72 |
| FJB201022 | 512 | 555.89 | 555.02 | 4.982 | 0.983 | 0.799 | 98.38 |
| FJB210101 | 492 | 572.63 | 570.76 | 4.705 | 0.965 | 0.759 | 98.20 |
| FJB210102 | 274 | 282.70 | 281.92 | 4.286 | 0.958 | 0.764 | 99.66 |
| FJB210103 | 554 | 610.93 | 609.79 | 5.005 | 0.976 | 0.792 | 98.25 |
| FJB210104 | 476 | 504.12 | 503.23 | 5.087 | 0.982 | 0.825 | 98.99 |
| FJB210105 | 242 | 251.53 | 250.50 | 4.195 | 0.958 | 0.764 | 99.70 |
| FJB210106 | 238 | 246.53 | 245.65 | 4.163 | 0.960 | 0.761 | 99.70 |
| FJB210107 | 491 | 527.03 | 526.00 | 4.933 | 0.973 | 0.796 | 98.82 |
| FJB210108 | 180 | 180.38 | 180.23 | 4.079 | 0.959 | 0.785 | 99.95 |
| FJB210109 | 455 | 492.55 | 491.36 | 4.850 | 0.973 | 0.792 | 98.89 |
| FJB210110 | 303 | 319.67 | 318.54 | 4.454 | 0.966 | 0.779 | 99.49 |
| FJB210111 | 433 | 464.03 | 463.09 | 4.728 | 0.970 | 0.779 | 98.92 |
| FJB210112 | 397 | 430.51 | 429.50 | 4.360 | 0.953 | 0.729 | 98.89 |
| FJB210113 | 372 | 411.27 | 410.15 | 4.248 | 0.953 | 0.718 | 98.79 |
| FJB210114 | 315 | 337.23 | 335.78 | 4.460 | 0.967 | 0.775 | 99.43 |
| FJB210115 | 453 | 514.55 | 513.33 | 4.213 | 0.931 | 0.689 | 98.20 |
| FJB210116 | 480 | 525.37 | 523.91 | 5.093 | 0.981 | 0.825 | 98.82 |
| FJB210117 | 376 | 414.89 | 413.63 | 4.178 | 0.941 | 0.705 | 98.89 |
| FJB210118 | 581 | 653.22 | 652.06 | 4.840 | 0.972 | 0.760 | 97.81 |
| FJB210119 | 538 | 604.72 | 603.43 | 4.857 | 0.971 | 0.772 | 98.11 |
| FJB210120 | 312 | 336.99 | 335.76 | 4.305 | 0.960 | 0.750 | 99.28 |
| FJB210121 | 554 | 626.00 | 624.69 | 4.930 | 0.974 | 0.780 | 97.98 |
| FJB210122 | 615 | 667.00 | 666.01 | 5.346 | 0.986 | 0.833 | 98.25 |
| FJB210401 | 468 | 559.14 | 557.32 | 4.691 | 0.974 | 0.763 | 97.93 |
| FJB210402 | 477 | 541.85 | 540.49 | 4.867 | 0.978 | 0.789 | 98.23 |
| FJB210403 | 407 | 449.85 | 448.71 | 4.545 | 0.964 | 0.756 | 98.69 |
| FJB210404 | 218 | 224.90 | 224.33 | 3.859 | 0.942 | 0.717 | 99.66 |
| FJB210405 | 348 | 392.01 | 390.52 | 4.350 | 0.958 | 0.743 | 98.87 |
| FJB210406 | 282 | 310.93 | 309.50 | 4.284 | 0.967 | 0.759 | 99.24 |
| FJB210407 | 509 | 602.76 | 600.88 | 4.711 | 0.969 | 0.756 | 97.91 |
| FJB210408 | 487 | 573.72 | 572.12 | 4.613 | 0.966 | 0.746 | 97.86 |
| FJB210409 | 432 | 510.75 | 508.90 | 4.549 | 0.965 | 0.750 | 98.23 |
| FJB210410 | 272 | 285.24 | 284.43 | 4.161 | 0.951 | 0.742 | 99.49 |
| FJB210411 | 346 | 401.51 | 399.63 | 4.360 | 0.962 | 0.746 | 98.77 |
| FJB210412 | 365 | 416.72 | 415.32 | 4.322 | 0.959 | 0.733 | 98.62 |
| FJB210413 | 234 | 259.93 | 258.00 | 4.026 | 0.946 | 0.738 | 99.44 |
| FJB210414 | 337 | 366.04 | 365.00 | 4.310 | 0.951 | 0.741 | 99.06 |
| FJB210415 | 227 | 265.12 | 262.00 | 3.844 | 0.931 | 0.709 | 99.39 |
| FJB210416 | 185 | 189.50 | 188.60 | 3.792 | 0.932 | 0.726 | 99.85 |
| FJB210417 | 403 | 423.65 | 422.97 | 4.806 | 0.977 | 0.801 | 99.11 |
| FJB210418 | 224 | 242.67 | 241.18 | 4.118 | 0.958 | 0.761 | 99.53 |
| FJB210419 | 737 | 804.70 | 803.62 | 5.567 | 0.985 | 0.843 | 97.84 |
| FJB210420 | 609 | 668.36 | 667.47 | 4.911 | 0.966 | 0.766 | 97.84 |
| FJB210421 | 376 | 428.45 | 426.90 | 4.505 | 0.964 | 0.760 | 98.69 |
| FJB210422 | 224 | 234.50 | 233.55 | 4.011 | 0.948 | 0.741 | 99.65 |

**Table S1B. 18S (microeukaryotes)**

| **Sample** | **ASV richness** | **ACE** | **Chao1** | **Shannon index** | **Simpson index** | **Pielou’s evenness** | **Good’s coverage** |
| --- | --- | --- | --- | --- | --- | --- | --- |
| FJ200701 | 1253 | 1325.65 | 1324.72 | 2.706 | 0.768 | 0.379 | 99.92 |
| FJ200702 | 1145 | 1222.91 | 1221.73 | 2.644 | 0.755 | 0.375 | 99.93 |
| FJ200703 | 1297 | 1372.50 | 1371.51 | 2.794 | 0.760 | 0.390 | 99.92 |
| FJ200704 | 1340 | 1366.16 | 1365.50 | 3.863 | 0.910 | 0.536 | 99.97 |
| FJ200705 | 1228 | 1236.83 | 1236.41 | 4.217 | 0.925 | 0.593 | 99.98 |
| FJ200706 | 1101 | 1106.51 | 1106.16 | 4.065 | 0.918 | 0.580 | 99.99 |
| FJ200707 | 1851 | 1916.52 | 1915.71 | 4.571 | 0.945 | 0.608 | 99.92 |
| FJ200708 | 1738 | 1864.39 | 1863.15 | 3.384 | 0.823 | 0.454 | 99.89 |
| FJ200709 | 1812 | 1905.52 | 1904.55 | 3.930 | 0.882 | 0.524 | 99.91 |
| FJ200710 | 2015 | 2056.76 | 2056.05 | 5.175 | 0.972 | 0.680 | 99.95 |
| FJ200711 | 1689 | 1704.36 | 1703.65 | 5.213 | 0.967 | 0.701 | 99.98 |
| FJ200712 | 1424 | 1431.63 | 1431.27 | 4.783 | 0.961 | 0.659 | 99.98 |
| FJ200713 | 1549 | 1607.86 | 1607.03 | 4.304 | 0.944 | 0.586 | 99.93 |
| FJ200714 | 1451 | 1547.20 | 1546.06 | 3.447 | 0.879 | 0.474 | 99.91 |
| FJ200715 | 1623 | 1668.95 | 1668.09 | 4.764 | 0.959 | 0.645 | 99.95 |
| FJ200716 | 1395 | 1414.04 | 1413.32 | 4.603 | 0.942 | 0.636 | 99.98 |
| FJ200717 | 1387 | 1393.43 | 1393.10 | 4.828 | 0.965 | 0.667 | 99.99 |
| FJ200718 | 1080 | 1091.52 | 1090.50 | 4.448 | 0.945 | 0.637 | 99.99 |
| FJ200719 | 1344 | 1353.50 | 1353.13 | 4.340 | 0.928 | 0.603 | 99.98 |
| FJ200720 | 1238 | 1248.56 | 1247.85 | 4.667 | 0.965 | 0.655 | 99.99 |
| FJ200721 | 1455 | 1461.51 | 1461.12 | 4.855 | 0.962 | 0.667 | 99.99 |
| FJ200722 | 1204 | 1204.04 | 1204.00 | 4.981 | 0.968 | 0.702 | 100.00 |
| FJ201001 | 1215 | 1215.45 | 1215.27 | 4.686 | 0.957 | 0.660 | 100.00 |
| FJ201002 | 1157 | 1157.00 | 1157.00 | 4.537 | 0.953 | 0.643 | 100.00 |
| FJ201003 | 1810 | 1885.43 | 1884.63 | 3.550 | 0.846 | 0.473 | 99.91 |
| FJ201004 | 1807 | 1843.96 | 1843.33 | 4.426 | 0.925 | 0.590 | 99.95 |
| FJ201005 | 1950 | 1978.49 | 1977.76 | 5.538 | 0.987 | 0.731 | 99.97 |
| FJ201006 | 1703 | 1709.78 | 1709.33 | 5.557 | 0.986 | 0.747 | 99.99 |
| FJ201007 | 1509 | 1510.41 | 1510.25 | 5.327 | 0.984 | 0.728 | 99.99 |
| FJ201008 | 1493 | 1495.63 | 1495.43 | 4.964 | 0.975 | 0.679 | 99.99 |
| FJ201009 | 1836 | 1880.98 | 1880.29 | 4.745 | 0.968 | 0.631 | 99.94 |
| FJ201010 | 1795 | 1837.73 | 1837.00 | 4.848 | 0.966 | 0.647 | 99.95 |
| FJ201011 | 2193 | 2232.29 | 2231.68 | 5.635 | 0.989 | 0.733 | 99.95 |
| FJ201012 | 2228 | 2257.79 | 2257.25 | 5.384 | 0.980 | 0.698 | 99.95 |
| FJ201013 | 1292 | 1297.06 | 1296.64 | 4.211 | 0.899 | 0.588 | 99.99 |
| FJ201014 | 1240 | 1249.59 | 1249.00 | 3.951 | 0.915 | 0.555 | 99.99 |
| FJ201015 | 1882 | 1951.14 | 1950.08 | 4.563 | 0.947 | 0.605 | 99.93 |
| FJ201016 | 2184 | 2263.26 | 2262.39 | 4.864 | 0.966 | 0.633 | 99.91 |
| FJ201017 | 1950 | 2094.96 | 2093.65 | 3.651 | 0.873 | 0.482 | 99.88 |
| FJ201018 | 1862 | 1881.12 | 1880.55 | 5.501 | 0.987 | 0.731 | 99.97 |
| FJ201019 | 1472 | 1478.47 | 1478.15 | 4.584 | 0.948 | 0.628 | 99.99 |
| FJ201020 | 1707 | 1719.66 | 1719.22 | 5.087 | 0.976 | 0.683 | 99.98 |
| FJ201021 | 1890 | 1904.52 | 1904.13 | 5.283 | 0.978 | 0.700 | 99.97 |
| FJ201022 | 2155 | 2223.50 | 2222.51 | 5.165 | 0.975 | 0.673 | 99.93 |
| FJ210101 | 1777 | 1919.05 | 1917.84 | 3.154 | 0.801 | 0.422 | 99.88 |
| FJ210102 | 1571 | 1583.01 | 1582.48 | 5.199 | 0.977 | 0.706 | 99.98 |
| FJ210103 | 1469 | 1471.67 | 1471.45 | 5.407 | 0.983 | 0.741 | 99.99 |
| FJ210104 | 1644 | 1657.64 | 1657.18 | 5.536 | 0.990 | 0.748 | 99.98 |
| FJ210105 | 1570 | 1592.65 | 1591.87 | 5.211 | 0.982 | 0.708 | 99.97 |
| FJ210106 | 1955 | 1984.16 | 1983.53 | 5.797 | 0.993 | 0.765 | 99.96 |
| FJ210107 | 1898 | 1925.22 | 1924.48 | 5.872 | 0.994 | 0.778 | 99.97 |
| FJ210108 | 1413 | 1416.06 | 1415.76 | 5.689 | 0.993 | 0.784 | 99.99 |
| FJ210109 | 1192 | 1192.04 | 1192.00 | 5.541 | 0.991 | 0.782 | 100.00 |
| FJ210110 | 1215 | 1215.48 | 1215.37 | 5.348 | 0.990 | 0.753 | 100.00 |
| FJ210111 | 1847 | 1875.96 | 1875.26 | 5.739 | 0.993 | 0.763 | 99.96 |
| FJ210112 | 1855 | 1892.72 | 1891.94 | 5.517 | 0.989 | 0.733 | 99.96 |
| FJ210113 | 1573 | 1598.41 | 1597.82 | 4.939 | 0.973 | 0.671 | 99.96 |
| FJ210114 | 1438 | 1443.63 | 1443.27 | 5.268 | 0.985 | 0.725 | 99.99 |
| FJ210115 | 1094 | 1094.89 | 1094.67 | 5.270 | 0.987 | 0.753 | 100.00 |
| FJ210116 | 1247 | 1254.76 | 1254.40 | 3.901 | 0.896 | 0.547 | 99.98 |
| FJ210117 | 1703 | 1739.43 | 1738.82 | 5.198 | 0.984 | 0.699 | 99.95 |
| FJ210118 | 1839 | 1871.54 | 1870.90 | 5.631 | 0.992 | 0.749 | 99.96 |
| FJ210119 | 1758 | 1829.16 | 1828.23 | 4.376 | 0.918 | 0.586 | 99.93 |
| FJ210120 | 1821 | 1863.74 | 1862.95 | 5.591 | 0.991 | 0.745 | 99.95 |
| FJ210121 | 1498 | 1507.92 | 1507.51 | 5.211 | 0.981 | 0.713 | 99.98 |
| FJ210122 | 2076 | 2102.23 | 2101.69 | 5.799 | 0.993 | 0.759 | 99.96 |
| FJ210401 | 1415 | 1472.50 | 1471.51 | 4.338 | 0.947 | 0.598 | 99.94 |
| FJ210402 | 1342 | 1419.05 | 1418.09 | 2.985 | 0.788 | 0.415 | 99.92 |
| FJ210403 | 1391 | 1472.12 | 1471.07 | 3.281 | 0.830 | 0.453 | 99.92 |
| FJ210404 | 1385 | 1419.67 | 1418.86 | 4.759 | 0.977 | 0.658 | 99.96 |
| FJ210405 | 1252 | 1271.74 | 1271.26 | 3.432 | 0.842 | 0.481 | 99.97 |
| FJ210406 | 1462 | 1494.45 | 1493.67 | 4.092 | 0.894 | 0.562 | 99.96 |
| FJ210407 | 1518 | 1579.53 | 1578.58 | 4.327 | 0.948 | 0.591 | 99.94 |
| FJ210408 | 1371 | 1420.92 | 1420.22 | 3.113 | 0.810 | 0.431 | 99.94 |
| FJ210409 | 1406 | 1520.38 | 1518.99 | 3.270 | 0.846 | 0.451 | 99.91 |
| FJ210410 | 1548 | 1565.59 | 1565.07 | 5.067 | 0.979 | 0.690 | 99.97 |
| FJ210411 | 1157 | 1161.88 | 1161.52 | 4.543 | 0.965 | 0.644 | 99.99 |
| FJ210412 | 1334 | 1379.67 | 1378.77 | 3.004 | 0.786 | 0.417 | 99.95 |
| FJ210413 | 1180 | 1219.77 | 1218.65 | 4.134 | 0.934 | 0.584 | 99.96 |
| FJ210414 | 1326 | 1353.22 | 1352.48 | 4.305 | 0.946 | 0.599 | 99.97 |
| FJ210415 | 1303 | 1322.81 | 1322.23 | 4.286 | 0.950 | 0.598 | 99.97 |
| FJ210416 | 1294 | 1325.22 | 1324.58 | 4.152 | 0.937 | 0.579 | 99.96 |
| FJ210417 | 1142 | 1167.70 | 1166.84 | 3.571 | 0.884 | 0.507 | 99.97 |
| FJ210418 | 1252 | 1281.75 | 1281.13 | 3.041 | 0.814 | 0.426 | 99.96 |
| FJ210419 | 1702 | 1754.45 | 1753.62 | 4.071 | 0.923 | 0.547 | 99.94 |
| FJ210420 | 1544 | 1588.17 | 1587.47 | 3.120 | 0.803 | 0.425 | 99.94 |
| FJ210421 | 1226 | 1275.78 | 1274.89 | 2.834 | 0.802 | 0.398 | 99.95 |
| FJ210422 | 1403 | 1411.95 | 1411.46 | 4.800 | 0.969 | 0.662 | 99.99 |

## Table S2. Neutral community model (NCM) fit parameters and ASV classifications across relative-abundance thresholds for bacterial (16S) and microeukaryotic (18S) communities.

Note: ASVs were classified as Above, Neutral, or Below neutral expectations based on whether their occurrence frequencies fell above, within, or below the 95% confidence interval of the NCM.

**Table S2A. 16S (bacteria)**

| **Relative-abundance threshold** | **ASVs retained (n)** | **m** | **Nm** | **R²** | **Above neutral (n, %)** | **Neutral (n, %)** | **Below neutral (n, %)** |
| --- | --- | --- | --- | --- | --- | --- | --- |
| 0 | 4808 | 3.541×10-06 | 3.116×10-04 | 0.132 | 2202 (45.8) | 2606 (54.2) | 0 (0.0) |
| 0.01 | 4808 | 3.541×10-06 | 3.116×10-04 | 0.132 | 2202 (45.8) | 2606 (54.2) | 0 (0.0) |
| 0.02 | 2418 | 1.906×10-05 | 1.678×10-03 | 0.191 | 1430 (59.1) | 988 (40.9) | 0 (0.0) |
| 0.05 | 1157 | 2.046×10-04 | 1.801×10-02 | 0.293 | 733 (63.4) | 363 (31.4) | 61 (5.3) |
| 0.1 | 709 | 8.272×10-04 | 7.279×10-02 | 0.362 | 472 (66.6) | 164 (23.1) | 73 (10.3) |

**Table S2B. 18S (microeukaryotes)**

| **Relative-abundance threshold** | **ASVs retained (n)** | **m** | **Nm** | **R²** | **Above neutral (n, %)** | **Neutral (n, %)** | **Below neutral (n, %)** |
| --- | --- | --- | --- | --- | --- | --- | --- |
| 0 | 8116 | 1.332×10-05 | 1.173×10-03 | 0.156 | 5829 (71.8) | 2223 (27.4) | 64 (0.8) |
| 0.01 | 8116 | 1.332×10-05 | 1.173×10-03 | 0.156 | 5829 (71.8) | 2223 (27.4) | 64 (0.8) |
| 0.02 | 6672 | 4.513×10-05 | 3.971×10-03 | 0.213 | 4945 (74.1) | 1549 (23.2) | 178 (2.7) |
| 0.05 | 4684 | 4.282×10-04 | 3.768×10-02 | 0.292 | 3621 (77.3) | 738 (15.8) | 325 (6.9) |
| 0.1 | 3675 | 1.891×10-03 | 1.664×10-01 | 0.360 | 2746 (74.7) | 539 (14.7) | 390 (10.6) |

## Table S3. Summary statistics of seasonal integrated co-occurrence networks (16S–18S–environment).

Note: Networks were constructed separately for winter, spring, summer and autumn using Spearman correlations with thresholds |*ρ*| ≥ 0.60 and FDR-adjusted q ≤ 0.05. Positive/negative edges refer to the sign of *ρ*. Global clustering denotes the global clustering coefficient.

| **Season** | **Samples (n)** | **Nodes (n)** | **Edges (n)** | **Positive edges (n)** | **Positive edges (%)** | **Negative edges (n)** | **Average degree** | **Density** | **Global clustering** | **Modularity** |
| --- | --- | --- | --- | --- | --- | --- | --- | --- | --- | --- |
| Winter | 22 | 1191 | 19158 | 16886 | 88.1 | 2272 | 32.17 | 0.0270 | 0.519 | 0.522 |
| Spring | 22 | 966 | 19333 | 15361 | 79.5 | 3972 | 40.03 | 0.0415 | 0.456 | 0.526 |
| Summer | 22 | 880 | 31576 | 26905 | 85.2 | 4671 | 71.76 | 0.0816 | 0.585 | 0.417 |
| Autumn | 22 | 1234 | 24089 | 20373 | 84.6 | 3716 | 39.04 | 0.0317 | 0.490 | 0.574 |

## Table S4. Composition of edge types in seasonal integrated co-occurrence networks (16S–18S–environment).

Note: Edge types are grouped as eukaryote–eukaryote (E–E), bacteria–eukaryote (B–E), bacteria–bacteria (B–B), and ASV–environment (ASV–ENV). Percentages are relative to total edges in each seasonal network.

| **Season** | **Edges (total n)** | **E–E (n, %)** | **B–E (n, %)** | **B–B (n, %)** | **ASV–ENV (n, %)** |
| --- | --- | --- | --- | --- | --- |
| Winter | 19158 | 15506 (80.9) | 2402 (12.5) | 1102 (5.8) | 148 (0.8) |
| Spring | 19333 | 11011 (57.0) | 3633 (18.8) | 4179 (21.6) | 510 (2.6) |
| Summer | 31576 | 25662 (81.3) | 3663 (11.6) | 1920 (6.1) | 331 (1.0) |
| Autumn | 24089 | 18208 (75.6) | 3245 (13.5) | 2374 (9.9) | 262 (1.1) |

## Table S5. Phylum-level composition of network nodes across seasons.

Note: Values are the fraction (%) of nodes assigned to each phylum in the integrated seasonal networks. Other aggregates all remaining phyla outside the listed categories.

| **Phylum** | **Winter** | **Spring** | **Summer** | **Autumn** |
| --- | --- | --- | --- | --- |
| Pseudomonadota | 24.1 | 25.3 | 17.6 | 23.3 |
| Dinoflagellata | 15.5 | 17.6 | 24.2 | 19.7 |
| Other | 15.0 | 9.2 | 6.6 | 10.4 |
| Gyrista | 9.1 | 6.6 | 12.6 | 12.2 |
| Ciliophora | 8.9 | 7.5 | 11.1 | 7.1 |
| Metazoa | 3.4 | 5.2 | 7.8 | 7.0 |
| Bacteroidota | 2.9 | 7.2 | 5.5 | 1.9 |
| Actinomycetota | 3.8 | 4.5 | 4.2 | 2.6 |
| Cyanobacteriota | 0.0 | 5.5 | 3.2 | 4.2 |
| Cercozoa | 5.6 | 2.3 | 1.0 | 3.3 |
| tista | 2.9 | 3.0 | 2.5 | 3.1 |
| lastida | 2.8 | 3.1 | 2.6 | 2.5 |
| Bigyra | 2.9 | 3.1 | 1.0 | 2.8 |
| Thermodesulfobacteriota | 3.0 | 0.0 | 0.0 | 0.0 |

## Table S6. Microzooplankton grazing on bacterioplankton estimated from dilution experiments.

Note: C0 is initial bacterial abundance (cells L−1). *μ* (h−1) is the intrinsic bacterial growth rate and *g* (h−1) is the grazing-induced mortality rate estimated from linear regressions of apparent net growth rate against dilution factor. BP is bacterial production (µg C L−1 h−1). Pi and Pp are grazing impacts on standing stock and production, expressed as percentages (%). R² is the coefficient of determination of the dilution regression. Blank cells indicate estimates not available due to poor regression fits.

| **Season** | **Station** | **C0 (cells L−1)** | ***μ* (h−1)** | ***g* (h−1)** | **BP (µg C L−1 h−1)** | **Pi (%)** | **Pp (%)** | **R²** |
| --- | --- | --- | --- | --- | --- | --- | --- | --- |
| Summer 2020 | A01 | 4.434×108 | 0.245 | 0.102 | 2.174 | 9.7 | 44.6 | 0.816 |
| Summer 2020 | A02 | 3.889×108 | 0.103 | 0.052 | 0.802 | 5.1 | 51.6 | 0.132 |
| Summer 2020 | A03 | 5.523×108 |  | 0.480 |  |  |  | 0.410 |
| Summer 2020 | A05 | 3.236×108 | 0.485 | 0.442 | 3.141 | 35.8 | 93.0 | 0.665 |
| Summer 2020 | A07 | 3.339×108 | 0.572 | 0.291 | 3.818 | 25.2 | 58.0 | 0.535 |
| Summer 2020 | A21 | 4.354×108 | 0.206 | 0.433 | 1.794 | 35.1 | 188.7 | 0.551 |
| Autumn 2020 | A01 | 1.768×108 | 0.074 | 0.335 | 0.263 | 28.5 | 396.8 | 0.721 |
| Autumn 2020 | A02 | 1.273×108 | 0.271 | 0.206 | 0.689 | 18.6 | 78.4 | 0.282 |
| Autumn 2020 | A03 | 1.648×108 |  |  |  |  |  | 0.222 |
| Autumn 2020 | A05 | 1.043×108 |  |  |  |  |  | 0.492 |
| Autumn 2020 | A07 | 1.174×108 | 0.250 | 0.228 | 0.586 | 20.4 | 92.4 | 0.206 |
| Autumn 2020 | A21 | 1.262×108 | 0.582 | 0.577 | 1.469 | 43.8 | 99.3 | 0.687 |
| Winter 2021 | A01 | 1.394×108 |  |  |  |  |  | 0.061 |
| Winter 2021 | A02 | 1.056×108 | 0.362 | 0.451 | 0.765 | 36.3 | 119.5 | 0.545 |
| Winter 2021 | A03 | 1.083×108 |  |  |  |  |  | 0.448 |
| Winter 2021 | A05 | 1.033×108 | 0.417 | 0.537 | 0.861 | 41.6 | 122.0 | 0.526 |
| Winter 2021 | A07 | 9.420×107 | 0.051 | 0.147 | 0.095 | 13.7 | 277.2 | 0.125 |
| Winter 2021 | A21 | 1.142×108 |  |  |  |  |  | 0.311 |
| Spring 2021 | A01 | 1.601×108 | 0.473 | 1.383 | 1.514 | 74.9 | 198.7 | 0.240 |
| Spring 2021 | A02 | 1.006×108 | 0.681 | 0.851 | 1.370 | 57.3 | 116.0 | 0.373 |
| Spring 2021 | A03 | 1.551×108 |  |  |  |  |  | 0.036 |
| Spring 2021 | A05 | 1.805×108 |  |  |  |  |  | 0.218 |
| Spring 2021 | A07 | 1.795×108 | 0.292 | 0.487 | 1.049 | 38.5 | 152.1 | 0.335 |
| Spring 2021 | A21 | 1.694×108 | 0.102 | 0.421 | 0.345 | 34.3 | 354.5 | 0.296 |

## Table S7. Microzooplankton grazing on phytoplankton estimated from dilution experiments and derived carbon fluxes.

Note: P0 is initial Chl *a* concentration (µg L−1). C0 is initial phytoplankton carbon concentration (µg C L−1). *μ* (d−1) is the intrinsic phytoplankton growth rate and *g* (d−1) is the microzooplankton grazing rate estimated from dilution regressions; *g*/*μ* is their ratio. PP is phytoplankton primary production (µg C L−1 d−1) and Ic is the daily ingestion flux of phytoplankton carbon by microzooplankton (µg C L−1 d−1). Pi and Pp are grazing impacts on standing stock and production, expressed as percentages (%). R² is the coefficient of determination of the dilution regression. Blank cells indicate estimates not available due to poor regression fits.

| **Season** | **Station** | **P0 (Chl *a*, µg L−1)** | **C0 (µg C L−1)** | ***μ* (d−1)** | ***g* (d−1)** | ***g*/*μ*** | **PP (µg C L−1 d−1)** | **Ic (µg C L−1 d−1)** | **Pi (%)** | **Pp (%)** | **R²** |
| --- | --- | --- | --- | --- | --- | --- | --- | --- | --- | --- | --- |
| Summer 2020 | A01 | 0.257 |  | 1.132 |  |  |  |  |  |  | 0.088 |
| Summer 2020 | A02 | 0.489 | 24472.29 | 0.847 | 0.403 | 0.475 | 26109.78 | 18932.45 | 77.4 | 58.0 | 0.889 |
| Summer 2020 | A03 | 0.469 | 23442.87 | 1.283 | 0.544 | 0.424 | 44529.57 | 35508.62 | 151.5 | 58.1 | 0.965 |
| Summer 2020 | A05 | 0.473 | 23648.18 | 1.113 | 0.756 | 0.679 | 31624.54 | 38153.58 | 161.3 | 79.0 | 0.913 |
| Summer 2020 | A07 | 0.338 | 16892.16 | 1.336 | 0.513 | 0.384 | 35006.96 | 25799.55 | 152.7 | 54.5 | 0.776 |
| Summer 2020 | A21 | 0.205 | 10264.40 | 1.212 | 0.138 | 0.114 | 22319.37 | 4435.96 | 43.2 | 18.3 | 0.116 |
| Autumn 2020 | A01 | 0.188 | 9407.13 | 0.655 | 0.234 | 0.357 | 7666.00 | 3774.91 | 40.1 | 43.4 | 0.780 |
| Autumn 2020 | A02 | 0.124 | 6206.05 | 0.856 | 0.317 | 0.370 | 7042.46 | 3969.16 | 64.0 | 47.2 | 0.895 |
| Autumn 2020 | A03 | 0.121 | 6057.73 | 0.993 | 0.664 | 0.669 | 7119.94 | 7937.48 | 131.0 | 77.1 | 0.880 |
| Autumn 2020 | A05 | 0.130 | 6520.77 | 2.245 | 2.877 | 1.282 | 10850.81 | 58099.63 | 891.0 | 105.6 | 0.658 |
| Autumn 2020 | A07 | 0.183 | 9148.68 | 0.898 | 0.559 | 0.623 | 9773.33 | 9617.56 | 105.1 | 72.3 | 0.952 |
| Autumn 2020 | A21 | 0.119 | 5973.23 | 1.016 | 0.484 | 0.476 | 8016.87 | 6329.22 | 106.0 | 60.1 | 0.850 |
| Winter 2021 | A01 | 0.095 | 4770.53 | 0.638 | 0.515 | 0.807 | 3241.90 | 3636.58 | 76.2 | 85.3 | 0.696 |
| Winter 2021 | A02 | 0.025 | 1257.27 | 2.138 | 2.741 | 1.282 | 2017.79 | 9973.99 | 793.3 | 106.1 | 0.777 |
| Winter 2021 | A03 | 0.042 | 2084.80 | 1.926 | 2.615 | 1.357 | 2903.53 | 13263.96 | 636.2 | 108.5 | 0.771 |
| Winter 2021 | A05 | 0.106 | 5296.22 | 0.605 | 0.585 | 0.968 | 3232.82 | 4293.89 | 81.1 | 97.6 | 0.907 |
| Winter 2021 | A07 | 0.115 | 5746.37 | 1.934 | 2.841 | 1.469 | 7305.74 | 37428.56 | 651.3 | 110.1 | 0.660 |
| Winter 2021 | A21 | 0.101 | 5052.25 | 0.654 | 0.525 | 0.803 | 3528.02 | 3970.05 | 78.6 | 85.1 | 0.759 |
| Spring 2021 | A01 | 0.151 | 7565.50 | 0.594 | 0.498 | 0.839 | 4716.45 | 5375.82 | 71.1 | 87.6 | 0.692 |
| Spring 2021 | A02 | 0.081 | 4034.90 | 1.001 | 0.518 | 0.517 | 5192.89 | 4437.37 | 110.0 | 63.9 | 0.903 |
| Spring 2021 | A03 | 0.107 | 5366.23 | 0.655 | 0.698 | 1.065 | 3441.93 | 5188.34 | 96.7 | 104.5 | 0.856 |
| Spring 2021 | A05 | 0.178 | 8908.45 | 0.593 | 0.453 | 0.763 | 5668.09 | 5864.98 | 65.8 | 81.4 | 0.879 |
| Spring 2021 | A07 | 0.172 | 8615.97 | 0.506 | 0.275 | 0.544 | 4906.99 | 3441.28 | 39.9 | 60.6 | 0.625 |
| Spring 2021 | A21 | 0.104 | 5187.67 | 0.780 | 0.862 | 1.105 | 3885.99 | 6537.20 | 126.0 | 106.6 | 0.936 |

# Supplementary Figures


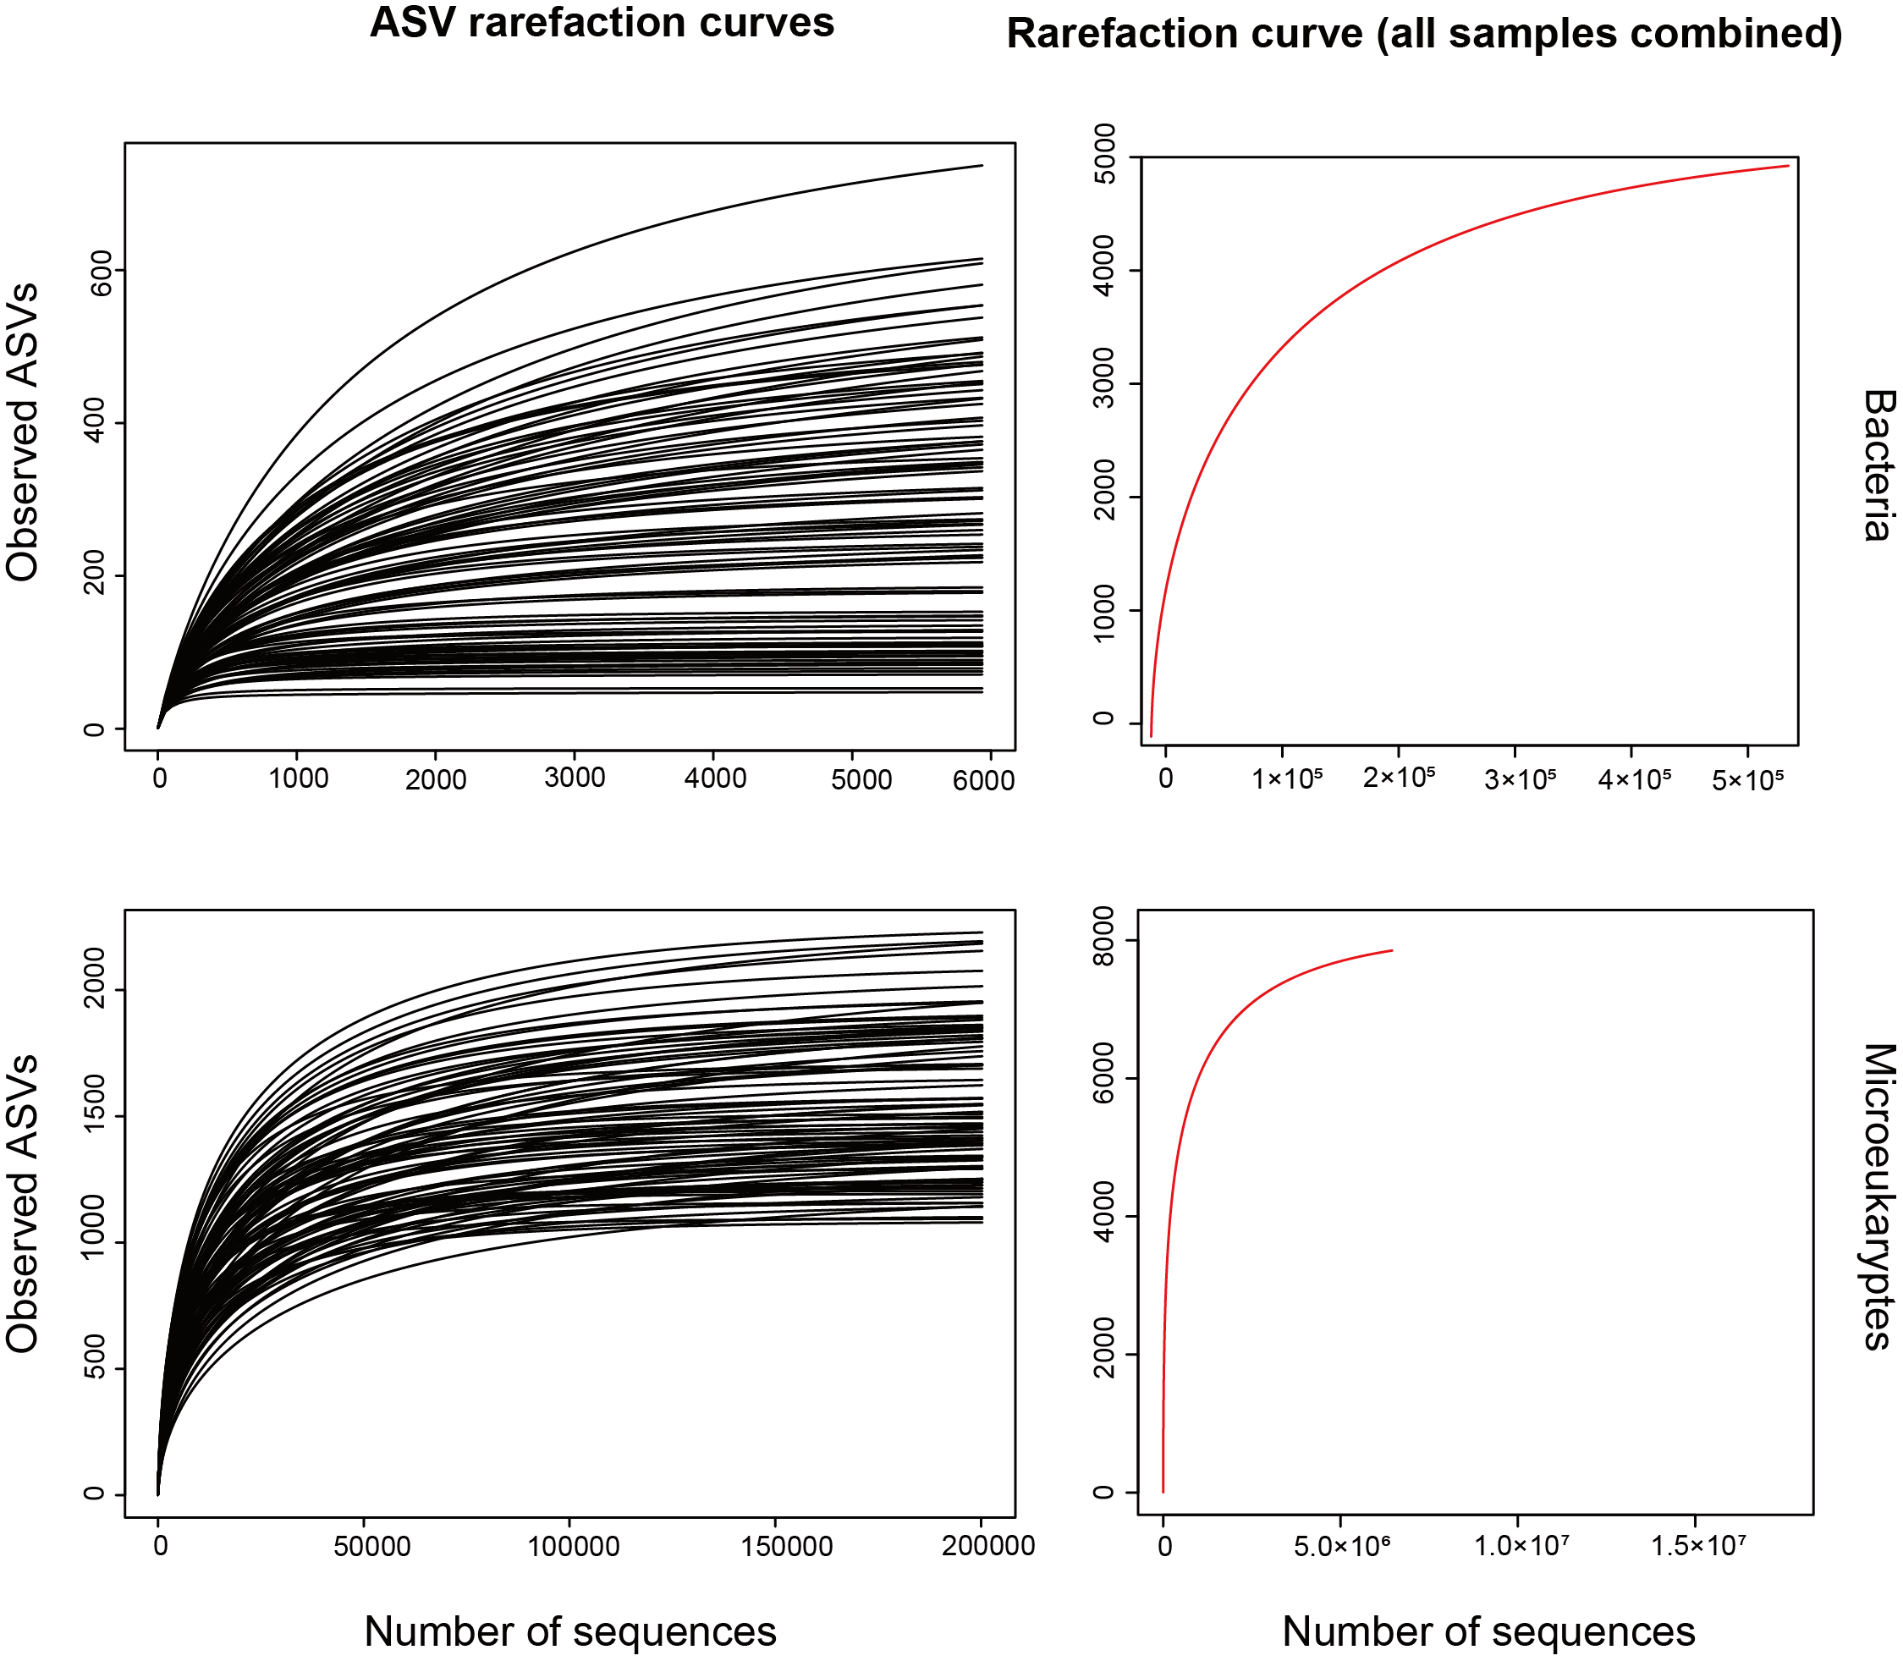


**Fig. S1.** Rarefaction curves for the 16S and 18S ASV datasets.

Rarefaction curves are shown for individual samples (left panels) and for the pooled dataset (right panels) for bacteria (16S; upper panels) and microeukaryotes (18S; lower panels).


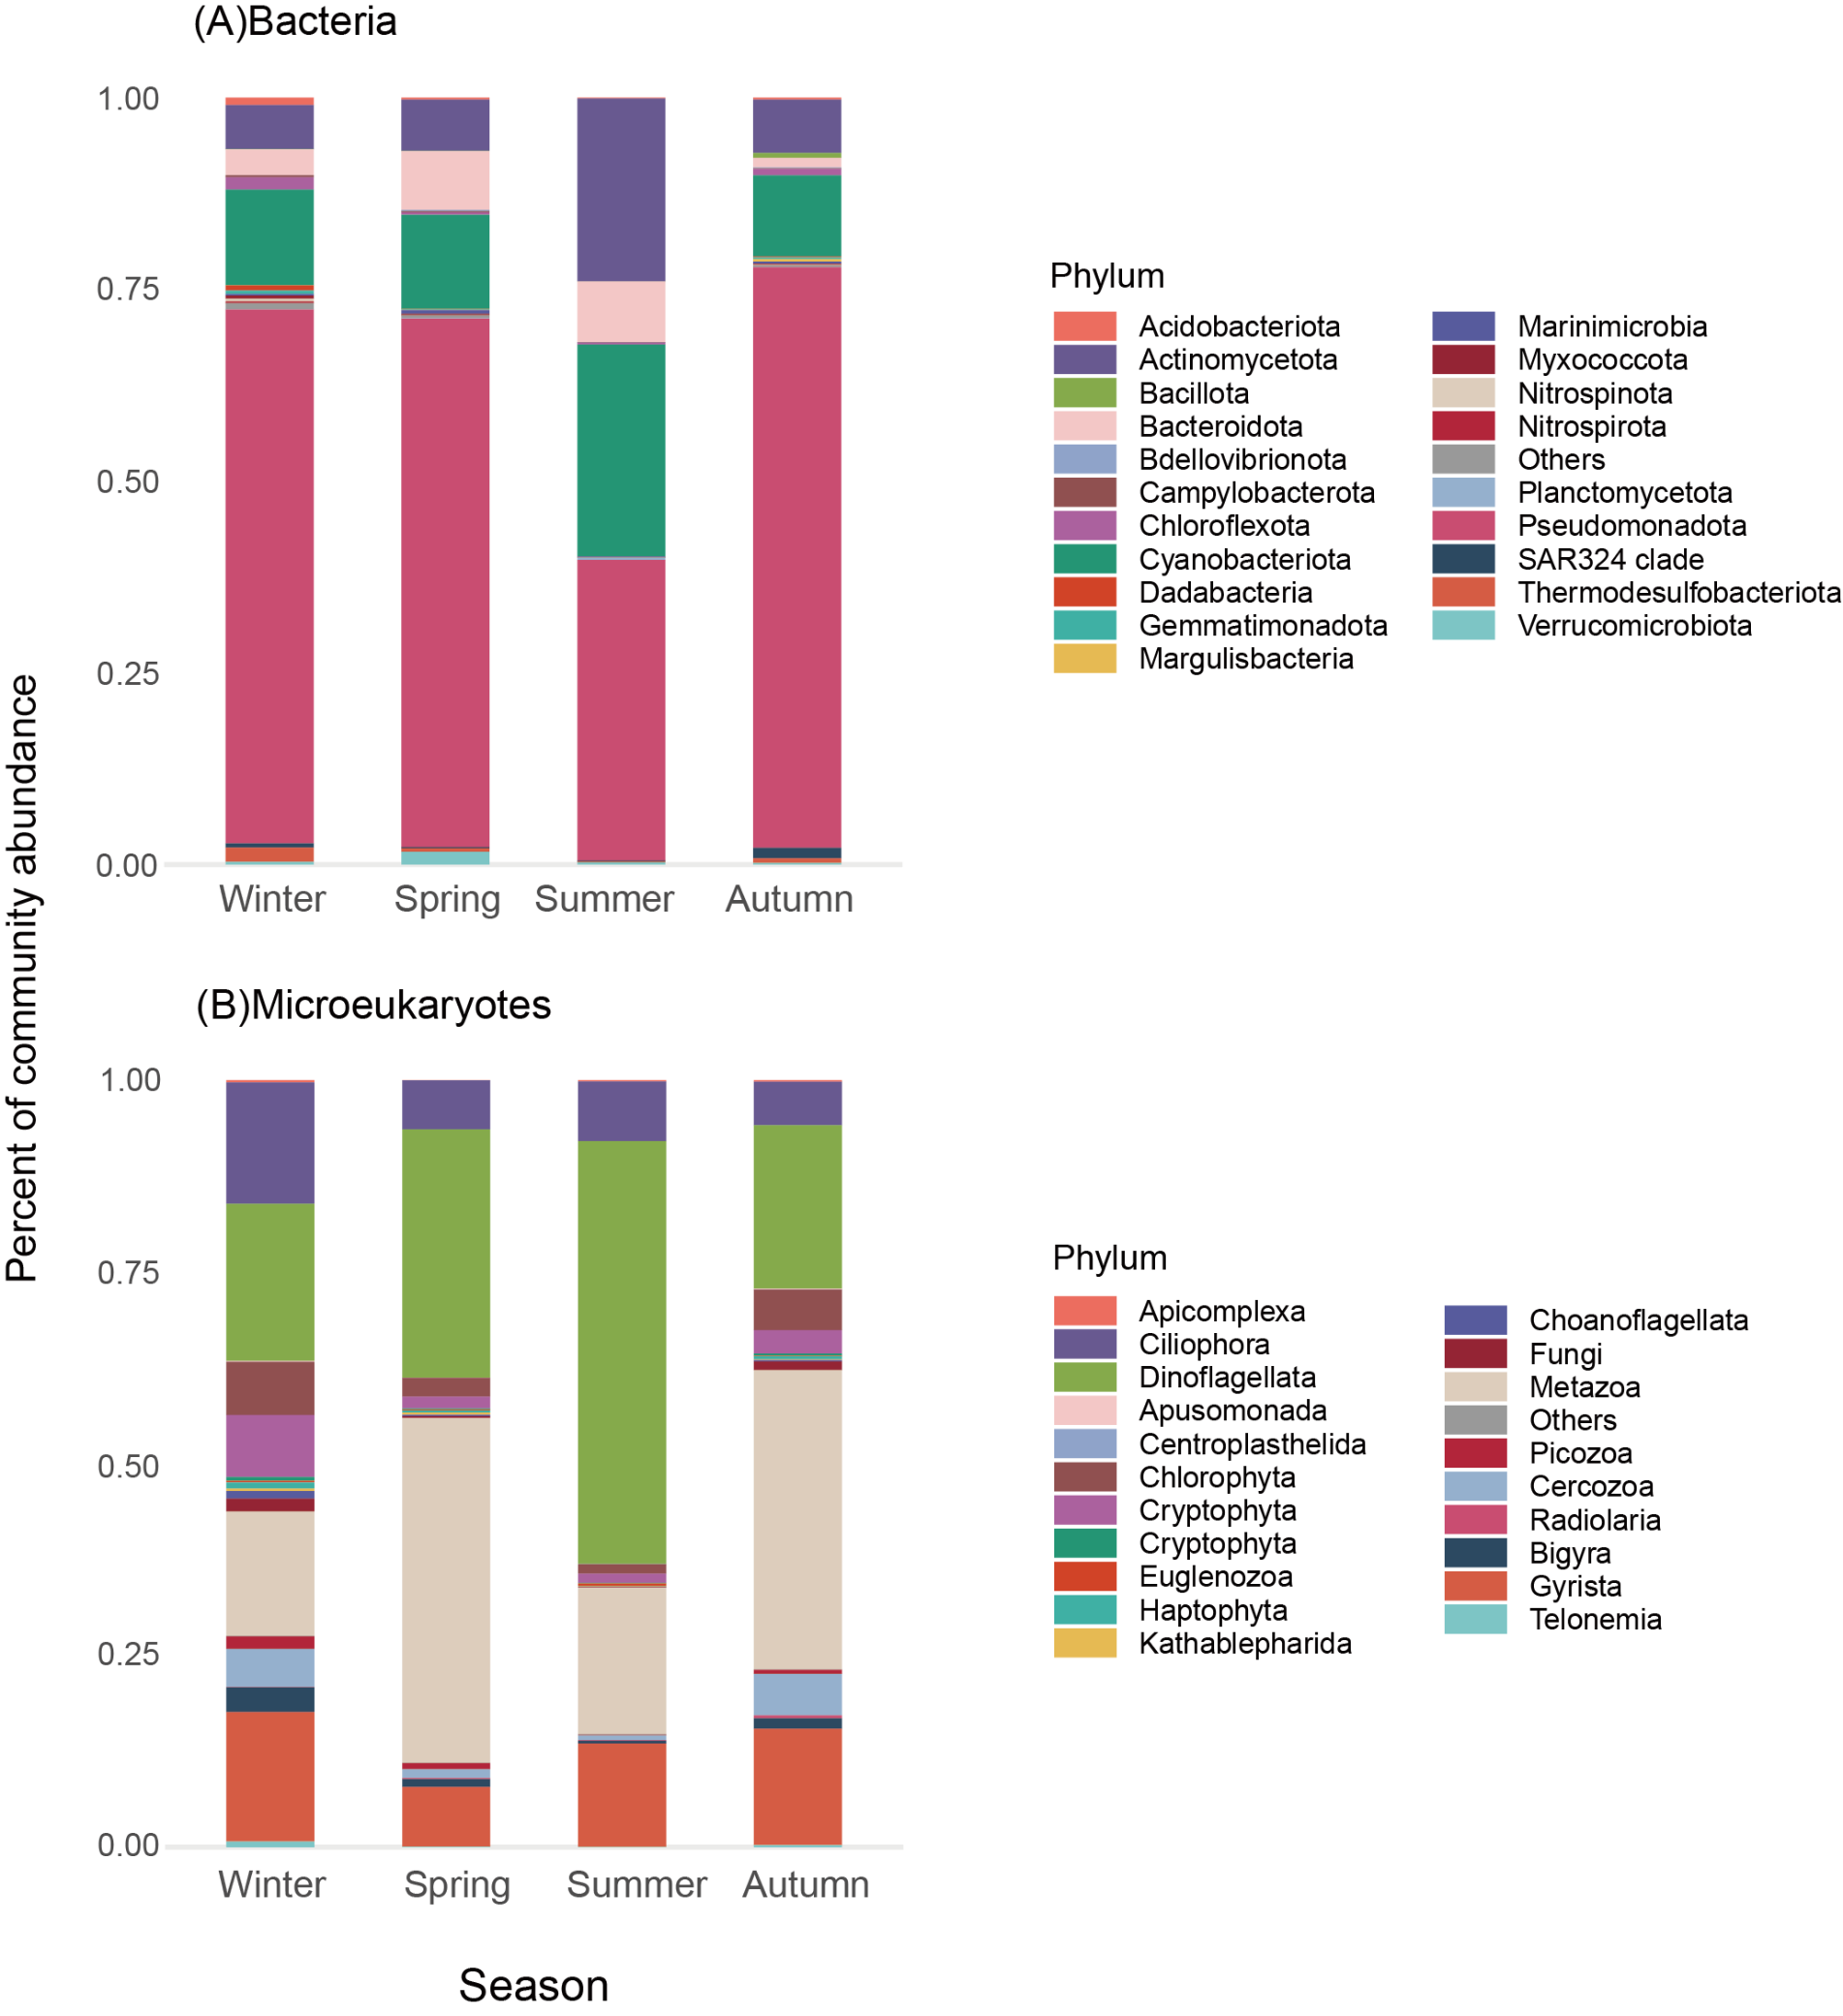


**Fig. S2.** Phylum-level community composition across seasons.

Stacked bar plots show relative abundances (percent of community abundance) of dominant phyla for (A) bacteria (16S) and (B) microeukaryotes (18S) across sampling seasons (winter, spring, summer, autumn). Low-abundance taxa are grouped as Others.


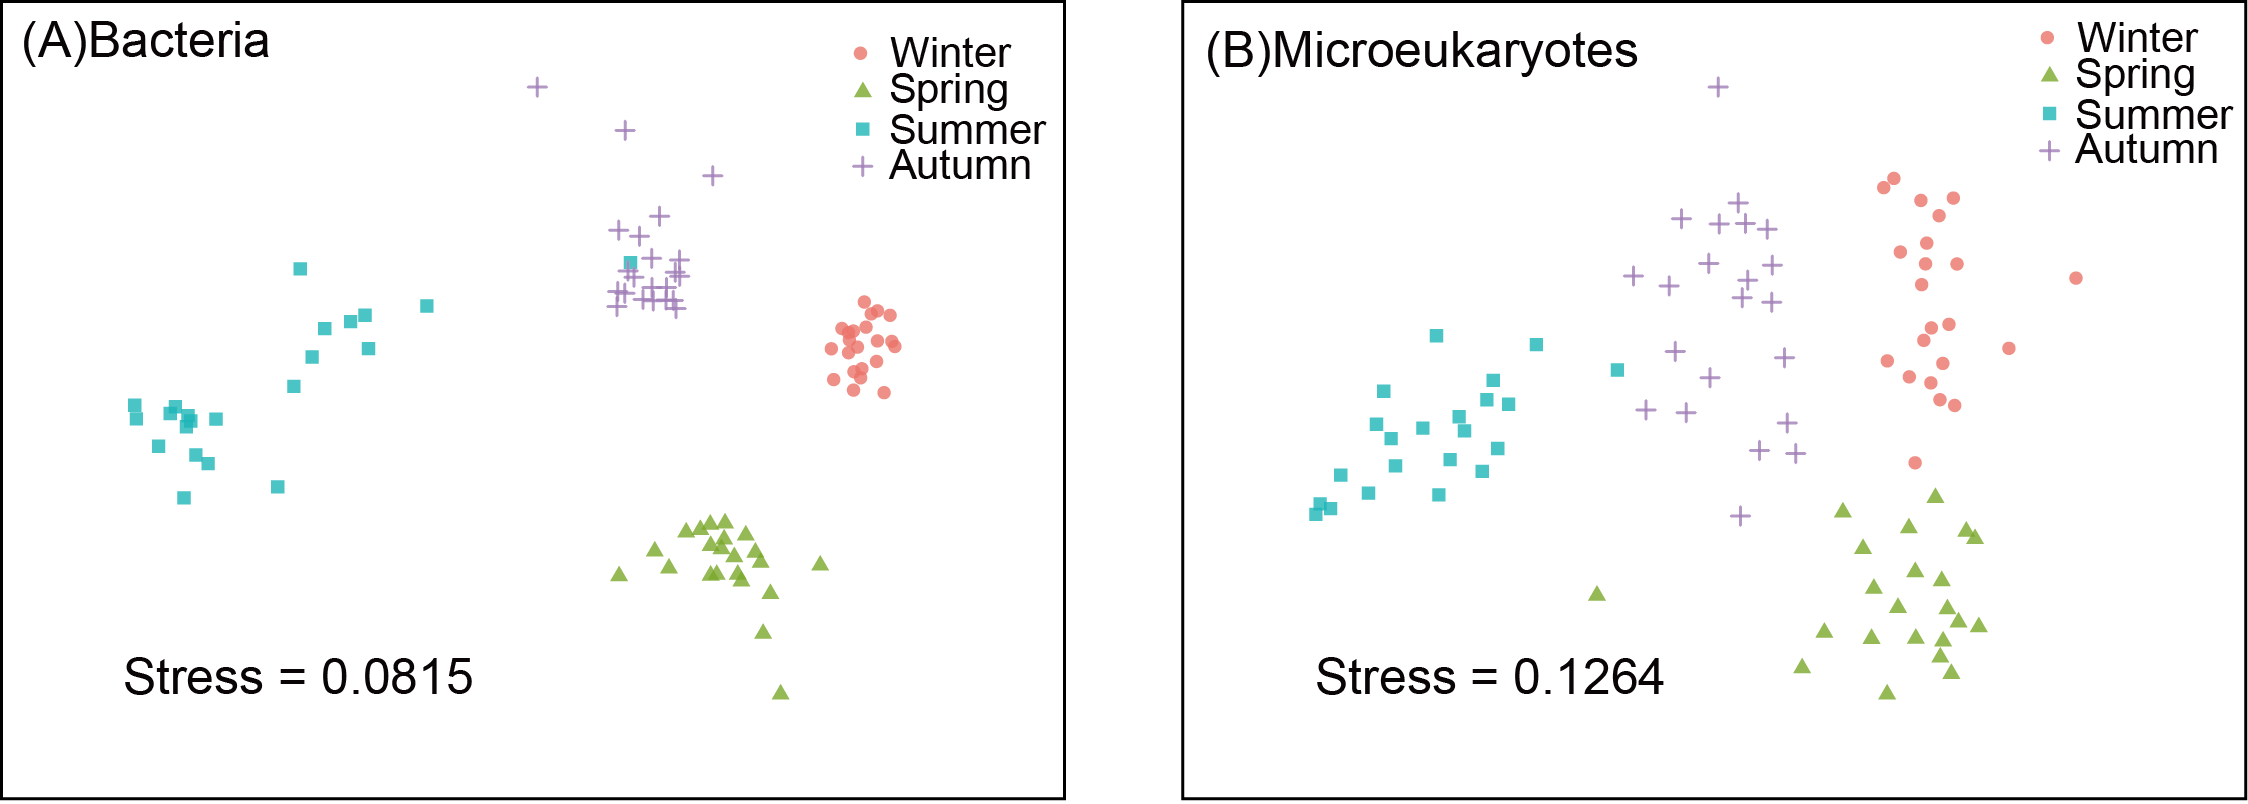


**Fig. S3.** NMDS ordinations of bacterial and microeukaryotic communities by season.

Non-metric multidimensional scaling (NMDS) based on Bray–Curtis dissimilarities illustrates temporal clustering of (A) bacterial (16S) and (B) microeukaryotic (18S) community composition. Stress values are reported in each panel.


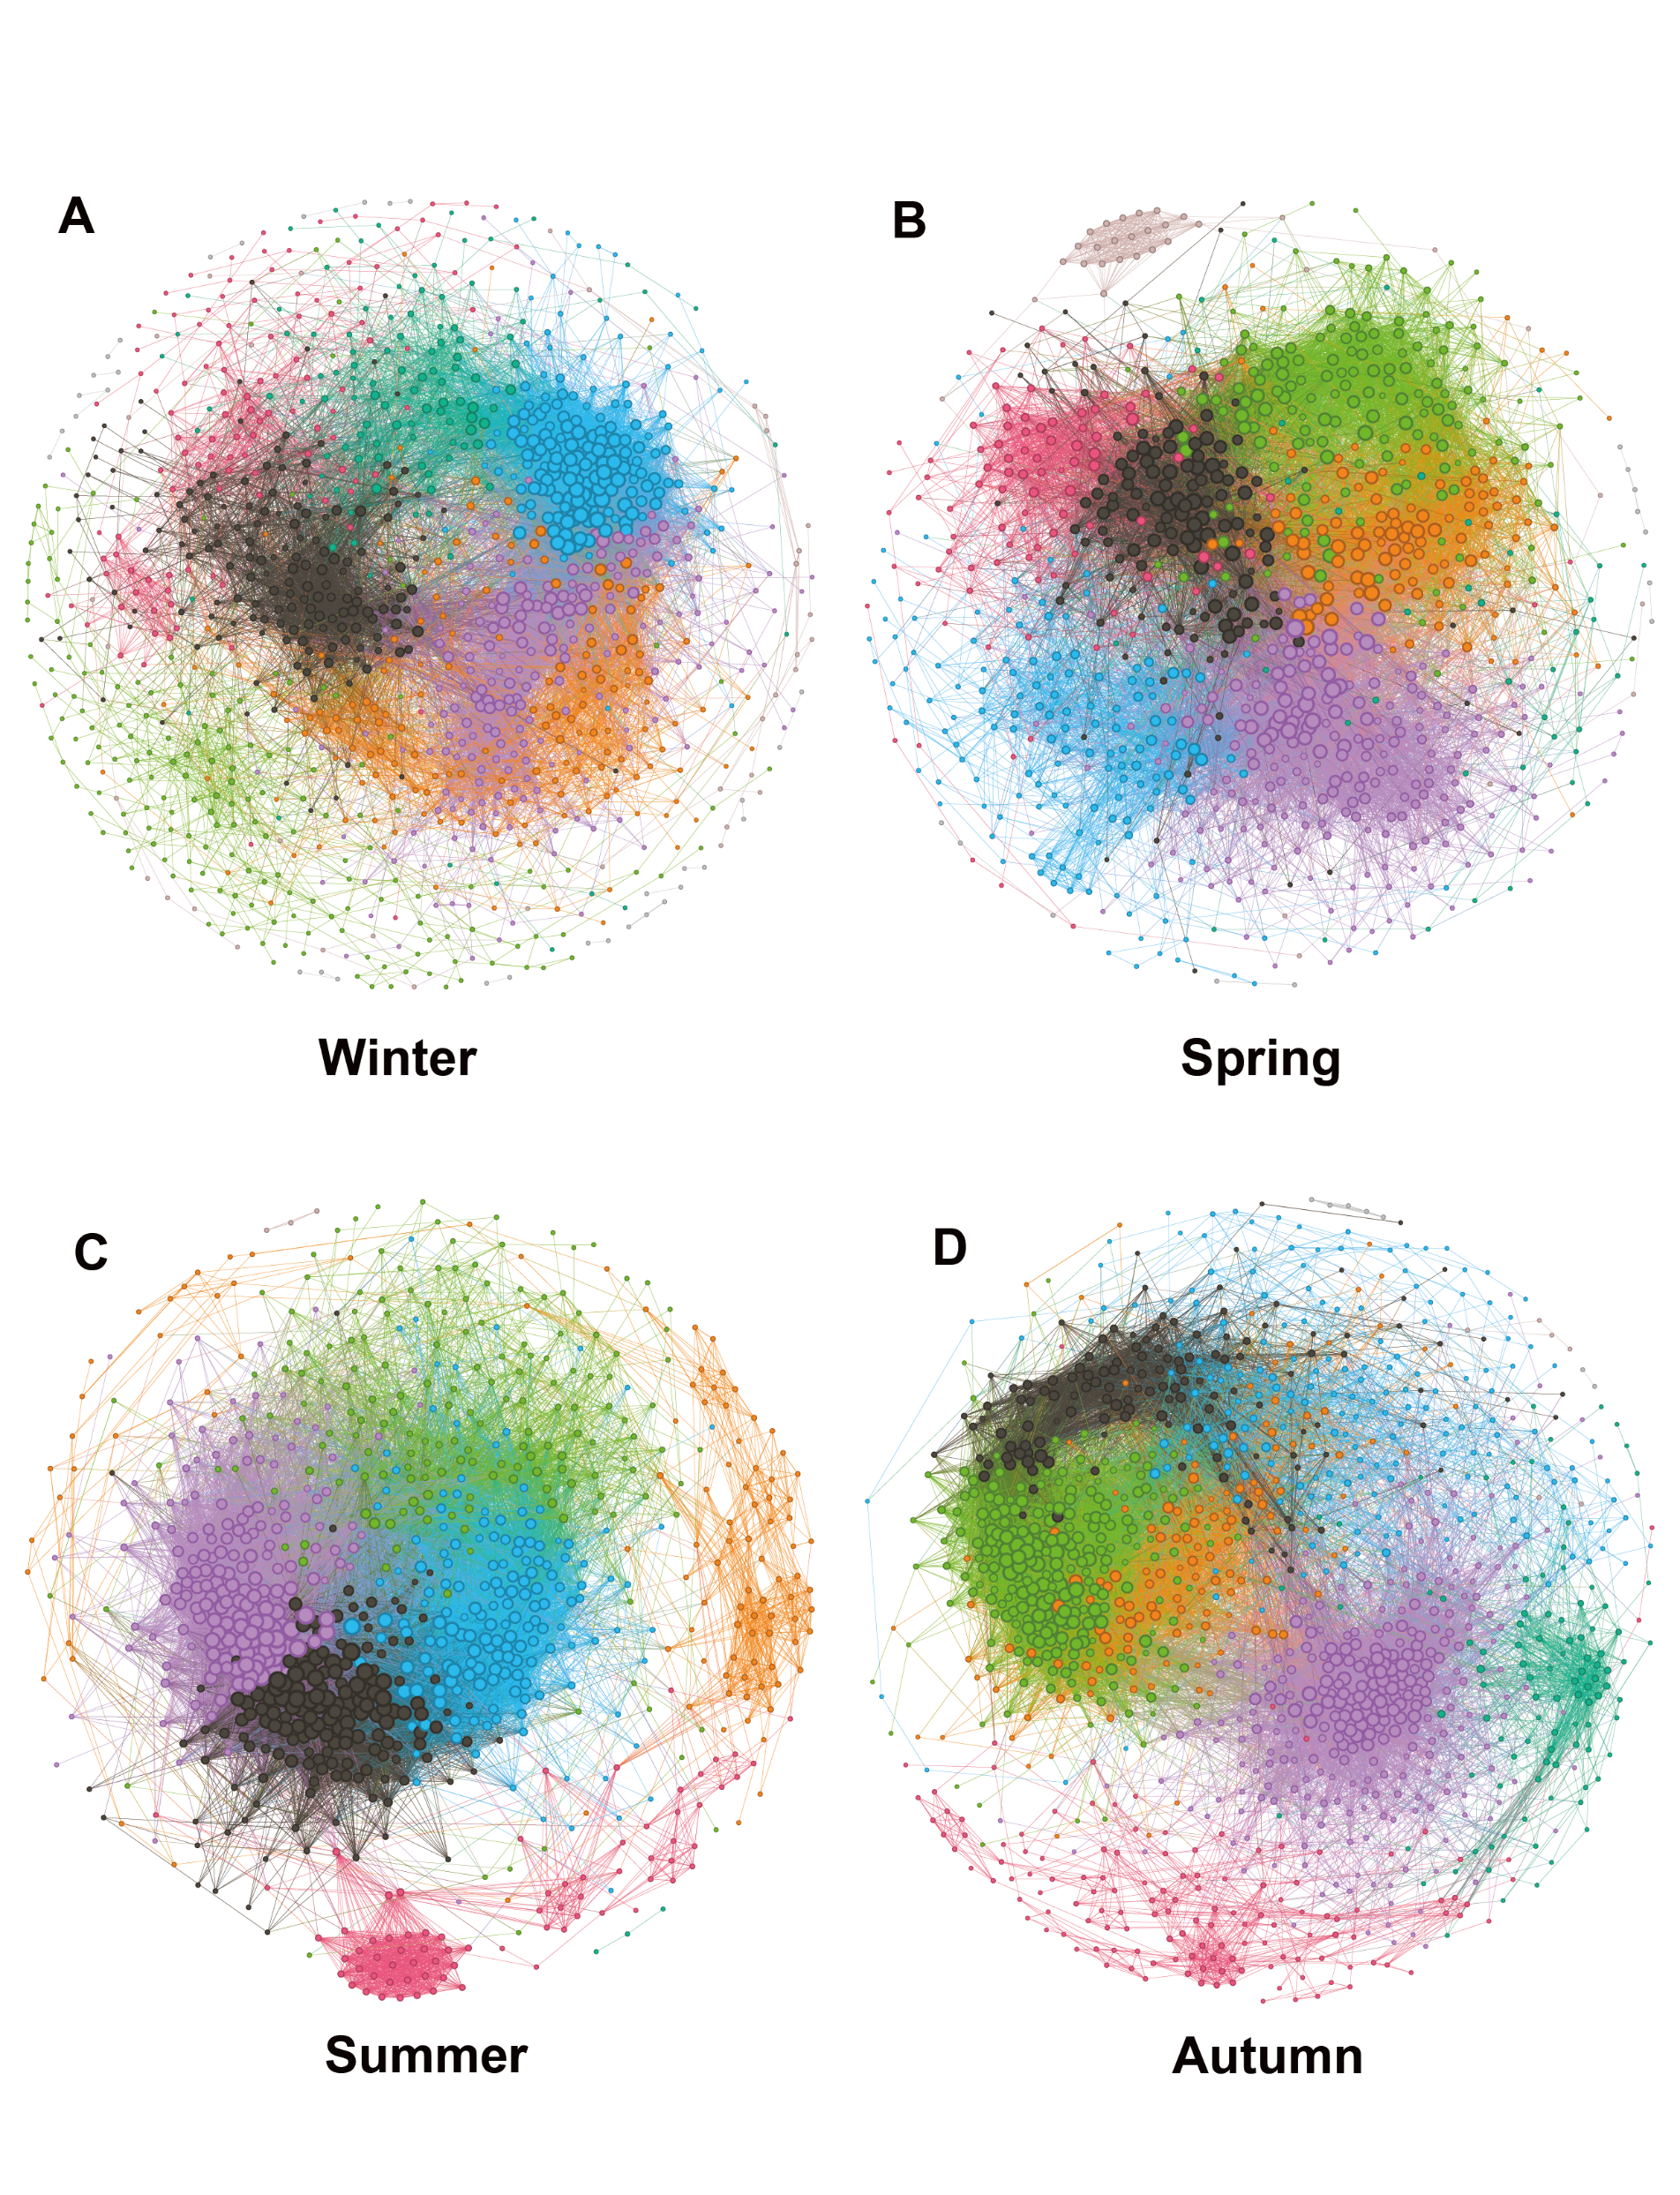


**Fig. S4.** Fig. S4. Modular structure of seasonal integrated co-occurrence networks.

Visualization of module organization for the integrated 16S–18S–environment co-occurrence networks in (A) Winter, (B) Spring, (C) Summer, and (D) Autumn. Node colors denote network modules identified by modularity optimization; edges represent significant correlations retained under the network-construction thresholds. Node size is scaled to highlight highly connected nodes.
